# Supplementary material for: Benthic foraminiferal Mn / Ca ratios reflect microhabitat preferences
Source: Copernicus journal article supplement (doi:10.5194/bg-14-3067-2017), 2017-06-22
Supplement: Supplementary file 1 [file bg-14-3067-2017-supplement.pdf]

Supplement of Biogeosciences, 14, 3067–3082, 2017  
<https://doi.org/10.5194/bg-14-3067-2017-supplement>  
© Author(s) 2017. This work is distributed under  
the Creative Commons Attribution 3.0 License.

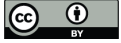

*Supplement of*

## **Benthic foraminiferal Mn / Ca ratios reflect microhabitat preferences**

**Karoliina A. Koho et al.**

*Correspondence to:* Karoliina A. Koho ([karoliina.koho@helsinki.fi](mailto:karoliina.koho@helsinki.fi))

The copyright of individual parts of the supplement might differ from the CC BY 3.0 License.

**Figure S1. Mn/Ca ratios individual foraminiferal chambers.**

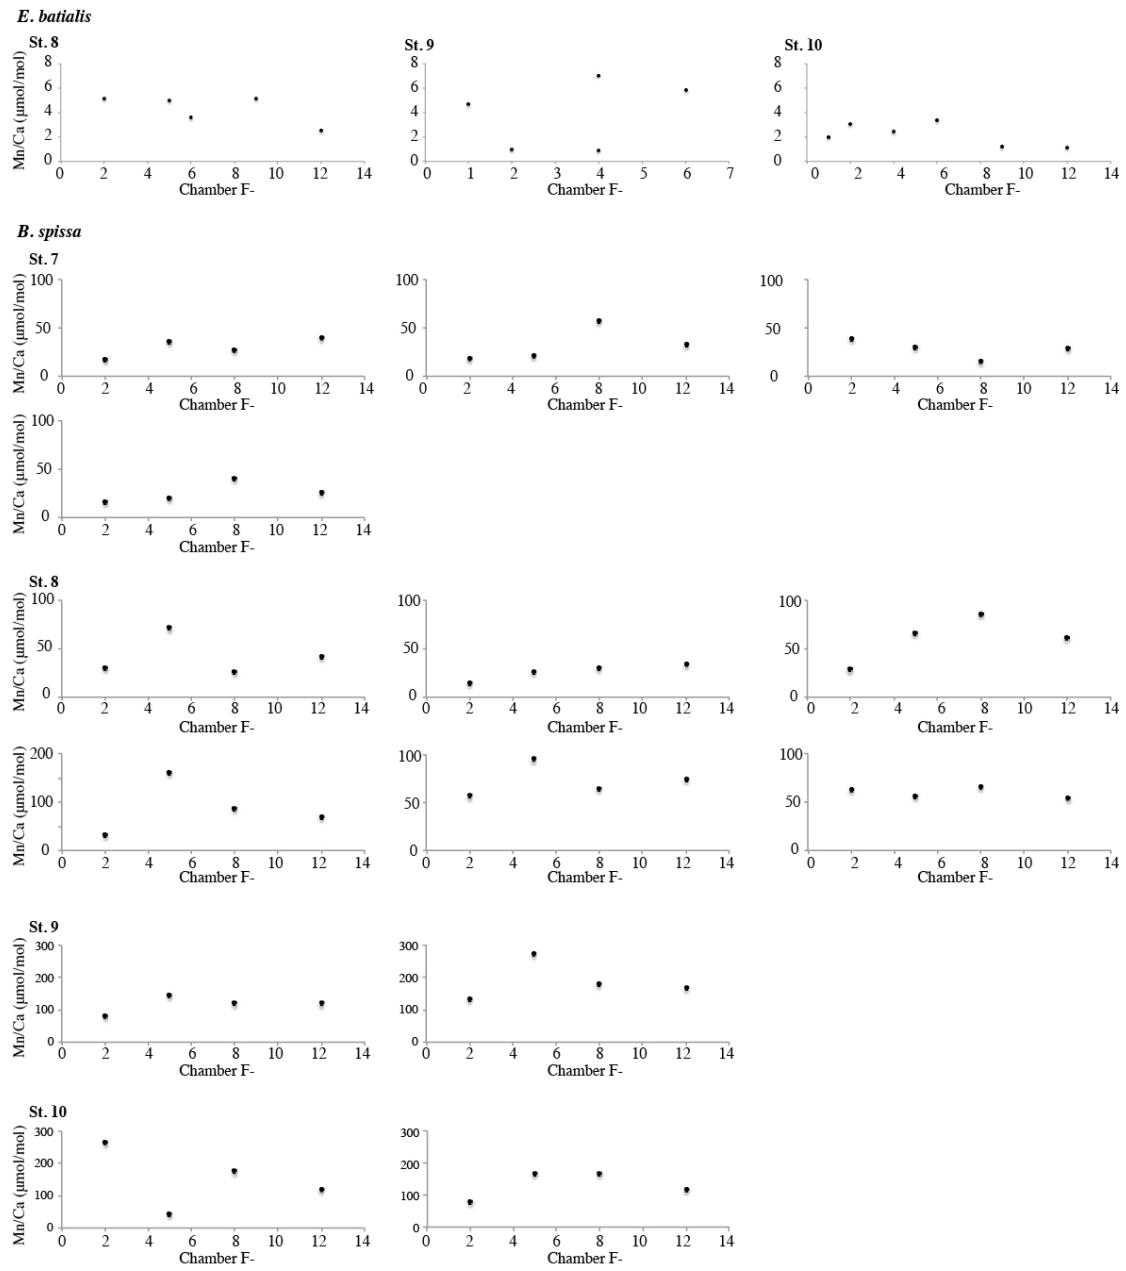

**Table S1: Raw elemental data (Mn/Ca ratios in foraminiferal test calcite ), Mn/Ca<sub>sw</sub> data at the average living depth (ALD) of each foraminiferal species, DM<sub>n</sub>-values, the average Mn/Ca ratios for each species per station and pore water Mn data**

| i.d | Species            | Station | Chamber F= | Sed depth (cm) | Mn/Ca<br>μmol/mol | ALD<br>cm | Mn/Ca <sub>sw</sub> at ALD<br>μmol/mol | DM <sub>n</sub> |
|-----|--------------------|---------|------------|----------------|-------------------|-----------|----------------------------------------|-----------------|
| 30  | <i>E. batialis</i> | 7       | 4          | 0-0.5          | 12.58             | 0.4       | no data                                |                 |
| 30  | <i>E. batialis</i> | 7       | 2          | 0-0.5          | 33.78             | 0.4       | no data                                |                 |
| 30  | <i>E. batialis</i> | 7       | 6          | 0-0.5          | 10.85             | 0.4       | no data                                |                 |
| 31  | <i>E. batialis</i> | 8       | 4          | 0-0.5          | 4.41              | 0.8       | 212.3                                  | 0.02            |
| 31  | <i>E. batialis</i> | 8       | 2          | 0-0.5          | 14.36             | 0.8       | 212.3                                  | 0.07            |
| 31  | <i>E. batialis</i> | 8       | 6          | 0-0.5          | 9.39              | 0.8       | 212.3                                  | 0.04            |
| 32  | <i>E. batialis</i> | 8       | 4          | 0-0.5          | 22.78             | 0.8       | 212.3                                  | 0.11            |
| 32  | <i>E. batialis</i> | 8       | 6          | 0-0.5          | 6.97              | 0.8       | 212.3                                  | 0.03            |
| 33  | <i>E. batialis</i> | 8       | 4          | 0-0.5          | 13.00             | 0.8       | 212.3                                  | 0.06            |
| 33  | <i>E. batialis</i> | 8       | 6          | 0-0.5          | 17.98             | 0.8       | 212.3                                  | 0.08            |
| 34  | <i>E. batialis</i> | 8       | 4          | 0-0.5          | 6.77              | 0.8       | 212.3                                  | 0.03            |
| 34  | <i>E. batialis</i> | 8       | 2          | 0-0.5          | 8.48              | 0.8       | 212.3                                  | 0.04            |
| 34  | <i>E. batialis</i> | 8       | 6          | 0-0.5          | 12.96             | 0.8       | 212.3                                  | 0.06            |
| 35  | <i>E. batialis</i> | 8       | 5          | 0-0.5          | 4.93              | 0.8       | 212.3                                  | 0.02            |
| 35  | <i>E. batialis</i> | 8       | 9          | 0-0.5          | 5.12              | 0.8       | 212.3                                  | 0.02            |
| 35  | <i>E. batialis</i> | 8       | 12         | 0-0.5          | 2.56              | 0.8       | 212.3                                  | 0.01            |
| 35  | <i>E. batialis</i> | 8       | 2          | 0-0.5          | 5.10              | 0.8       | 212.3                                  | 0.02            |
| 35  | <i>E. batialis</i> | 8       | 6          | 0-0.5          | 3.62              | 0.8       | 212.3                                  | 0.02            |
| 36  | <i>E. batialis</i> | 8       | 4          | 0-0.5          | 4.62              | 0.8       | 212.3                                  | 0.02            |
| 36  | <i>E. batialis</i> | 8       | 2          | 0-0.5          | 6.17              | 0.8       | 212.3                                  | 0.03            |
| 36  | <i>E. batialis</i> | 8       | 6          | 0-0.5          | 5.88              | 0.8       | 212.3                                  | 0.03            |
| 37  | <i>E. batialis</i> | 8       | 6          | 0-0.5          | 10.96             | 0.8       | 212.3                                  | 0.05            |
| 38  | <i>E. batialis</i> | 8       | 6          | 0-0.5          | 5.10              | 0.8       | 212.3                                  | 0.02            |
| 39  | <i>E. batialis</i> | 8       | 6          | 0-0.5          | 10.79             | 0.8       | 212.3                                  | 0.05            |
| 40  | <i>E. batialis</i> | 8       | 2          | 0-0.5          | 16.13             | 0.8       | 212.3                                  | 0.08            |
| 40  | <i>E. batialis</i> | 8       | 6          | 0-0.5          | 12.07             | 0.8       | 212.3                                  | 0.06            |
| 41  | <i>E. batialis</i> | 9       | 4          | 0-0.5          | 3.10              | 0.9       | no data                                |                 |
| 41  | <i>E. batialis</i> | 9       | 2          | 0-0.5          | 3.26              | 0.9       | no data                                |                 |
| 41  | <i>E. batialis</i> | 9       | 6          | 0-0.5          | 3.37              | 0.9       | no data                                |                 |
| 42  | <i>E. batialis</i> | 9       | 4          | 0-0.5          | 5.04              | 0.9       | no data                                |                 |
| 42  | <i>E. batialis</i> | 9       | 6          | 0-0.5          | 6.59              | 0.9       | no data                                |                 |
| 43  | <i>E. batialis</i> | 9       | 4          | 0-0.5          | 3.25              | 0.9       | no data                                |                 |
| 43  | <i>E. batialis</i> | 9       | 2          | 0-0.5          | 8.35              | 0.9       | no data                                |                 |
| 43  | <i>E. batialis</i> | 9       | 6          | 0-0.5          | 7.23              | 0.9       | no data                                |                 |
| 44  | <i>E. batialis</i> | 9       | 4          | 0-0.5          | 4.93              | 0.9       | no data                                |                 |
| 44  | <i>E. batialis</i> | 9       | 2          | 0-0.5          | 4.53              | 0.9       | no data                                |                 |
| 44  | <i>E. batialis</i> | 9       | 6          | 0-0.5          | 6.84              | 0.9       | no data                                |                 |
| 45  | <i>E. batialis</i> | 9       | 4          | 0-0.5          | 5.59              | 0.9       | no data                                |                 |
| 45  | <i>E. batialis</i> | 9       | 2          | 0-0.5          | 3.73              | 0.9       | no data                                |                 |
| 45  | <i>E. batialis</i> | 9       | 6          | 0-0.5          | 3.71              | 0.9       | no data                                |                 |
| 46  | <i>E. batialis</i> | 9       | 4          | 0-0.5          | 7.32              | 0.9       | no data                                |                 |

|    |                    |    |    |        |       |     |         |      |
|----|--------------------|----|----|--------|-------|-----|---------|------|
| 46 | <i>E. batialis</i> | 9  | 6  | 0.-0.5 | 11.92 | 0.9 | no data |      |
| 47 | <i>E. batialis</i> | 9  | 4  | 0-0.5  | 5.63  | 0.9 | no data |      |
| 47 | <i>E. batialis</i> | 9  | 6  | 0.-0.5 | 7.15  | 0.9 | no data |      |
| 48 | <i>E. batialis</i> | 9  | 4  | 0-0.5  | 0.92  | 0.9 | no data |      |
| 48 | <i>E. batialis</i> | 9  | 1  | 0-0.5  | 4.74  | 0.9 | no data |      |
| 48 | <i>E. batialis</i> | 9  | 4  | 0-0.5  | 7.08  | 0.9 | no data |      |
| 48 | <i>E. batialis</i> | 9  | 2  | 0.-0.5 | 0.98  | 0.9 | no data |      |
| 48 | <i>E. batialis</i> | 9  | 6  | 0.-0.5 | 5.86  | 0.9 | no data |      |
| 49 | <i>E. batialis</i> | 10 | 9  | 0-0.5  | 1.24  | 1.2 | 154.8   | 0.01 |
| 49 | <i>E. batialis</i> | 10 | 1  | 0-0.5  | 2.00  | 1.2 | 154.8   | 0.01 |
| 49 | <i>E. batialis</i> | 10 | 4  | 0-0.5  | 2.51  | 1.2 | 154.8   | 0.02 |
| 49 | <i>E. batialis</i> | 10 | 12 | 0-0.5  | 1.13  | 1.2 | 154.8   | 0.01 |
| 49 | <i>E. batialis</i> | 10 | 2  | 0.-0.5 | 3.06  | 1.2 | 154.8   | 0.02 |
| 49 | <i>E. batialis</i> | 10 | 6  | 0.-0.5 | 3.39  | 1.2 | 154.8   | 0.02 |
| 50 | <i>E. batialis</i> | 10 | 4  | 0-0.5  | 2.22  | 1.2 | 154.8   | 0.01 |
| 50 | <i>E. batialis</i> | 10 | 2  | 0.-0.5 | 1.51  | 1.2 | 154.8   | 0.01 |
| 50 | <i>E. batialis</i> | 10 | 6  | 0.-0.5 | 2.18  | 1.2 | 154.8   | 0.01 |
| 51 | <i>E. batialis</i> | 10 | 4  | 0-0.5  | 3.57  | 1.2 | 154.8   | 0.02 |
| 51 | <i>E. batialis</i> | 10 | 6  | 0.-0.5 | 3.06  | 1.2 | 154.8   | 0.02 |
| 52 | <i>E. batialis</i> | 10 | 4  | 0-0.5  | 3.41  | 1.2 | 154.8   | 0.02 |
| 52 | <i>E. batialis</i> | 10 | 2  | 0.-0.5 | 2.33  | 1.2 | 154.8   | 0.02 |
| 52 | <i>E. batialis</i> | 10 | 6  | 0.-0.5 | 3.49  | 1.2 | 154.8   | 0.02 |
| 53 | <i>E. batialis</i> | 10 | 4  | 0-0.5  | 1.79  | 1.2 | 154.8   | 0.01 |
| 53 | <i>E. batialis</i> | 10 | 6  | 0.-0.5 | 2.31  | 1.2 | 154.8   | 0.01 |

| i.d | Species          | Station | Chamber F= | Sed depth (cm) | Mn/Ca    | ALD | Mn/Casw at ALD | DMn  |
|-----|------------------|---------|------------|----------------|----------|-----|----------------|------|
|     |                  |         |            |                | μmol/mol | cm  | μmol/mol       |      |
| 44  | <i>B. spissa</i> | 7       | 2          | 0-0.5          | 17.83    | 2.2 | no data        |      |
| 44  | <i>B. spissa</i> | 7       | 5          | 0-0.5          | 36.28    | 2.2 | no data        |      |
| 44  | <i>B. spissa</i> | 7       | 8          | 0-0.5          | 27.00    | 2.2 | no data        |      |
| 44  | <i>B. spissa</i> | 7       | 12         | 0-0.5          | 39.70    | 2.2 | no data        |      |
| 45  | <i>B. spissa</i> | 7       | 2          | 0-0.5          | 19.23    | 2.2 | no data        |      |
| 45  | <i>B. spissa</i> | 7       | 5          | 0-0.5          | 22.01    | 2.2 | no data        |      |
| 45  | <i>B. spissa</i> | 7       | 8          | 0-0.5          | 57.29    | 2.2 | no data        |      |
| 45  | <i>B. spissa</i> | 7       | 12         | 0-0.5          | 32.21    | 2.2 | no data        |      |
| 46  | <i>B. spissa</i> | 7       | 2          | 0-0.5          | 38.09    | 2.2 | no data        |      |
| 46  | <i>B. spissa</i> | 7       | 5          | 0-0.5          | 30.47    | 2.2 | no data        |      |
| 46  | <i>B. spissa</i> | 7       | 8          | 0-0.5          | 15.07    | 2.2 | no data        |      |
| 46  | <i>B. spissa</i> | 7       | 12         | 0-0.5          | 28.81    | 2.2 | no data        |      |
| 47  | <i>B. spissa</i> | 7       | 2          | 0-0.5          | 15.73    | 2.2 | no data        |      |
| 47  | <i>B. spissa</i> | 7       | 5          | 0-0.5          | 19.65    | 2.2 | no data        |      |
| 47  | <i>B. spissa</i> | 7       | 8          | 0-0.5          | 40.36    | 2.2 | no data        |      |
| 47  | <i>B. spissa</i> | 7       | 12         | 0-0.5          | 25.62    | 2.2 | no data        |      |
| 48  | <i>B. spissa</i> | 7       | 2          | 0-0.5          | 23.37    | 2.2 | no data        |      |
| 48  | <i>B. spissa</i> | 7       | 5          | 0-0.5          | 9.61     | 2.2 | no data        |      |
| 49  | <i>B. spissa</i> | 7       | 2          | 0-0.5          | 19.23    | 2.2 | no data        |      |
| 49  | <i>B. spissa</i> | 7       | 5          | 0-0.5          | 37.67    | 2.2 | no data        |      |
| 49  | <i>B. spissa</i> | 7       | 12         | 0-0.5          | 27.29    | 2.2 | no data        |      |
| 50  | <i>B. spissa</i> | 7       | 2          | 0-0.5          | 176.40   | 2.2 | no data        |      |
| 50  | <i>B. spissa</i> | 7       | 5          | 0-0.5          | 52.07    | 2.2 | no data        |      |
| 50  | <i>B. spissa</i> | 7       | 12         | 0-0.5          | 48.70    | 2.2 | no data        |      |
| 51  | <i>B. spissa</i> | 7       | 2          | 0-0.5          | 19.99    | 2.2 | no data        |      |
| 51  | <i>B. spissa</i> | 7       | 5          | 0-0.5          | 66.24    | 2.2 | no data        |      |
| 51  | <i>B. spissa</i> | 7       | 12         | 0-0.5          | 52.07    | 2.2 | no data        |      |
| 52  | <i>B. spissa</i> | 8       | 2          | 0-0.5          | 29.70    | 1.9 | 158.8          | 0.19 |
| 52  | <i>B. spissa</i> | 8       | 5          | 0-0.5          | 72.02    | 1.9 | 158.8          | 0.45 |
| 52  | <i>B. spissa</i> | 8       | 8          | 0-0.5          | 25.65    | 1.9 | 158.8          | 0.16 |
| 52  | <i>B. spissa</i> | 8       | 12         | 0-0.5          | 41.17    | 1.9 | 158.8          | 0.26 |
| 53  | <i>B. spissa</i> | 8       | 2          | 0-0.5          | 29.27    | 1.9 | 158.8          | 0.18 |
| 53  | <i>B. spissa</i> | 8       | 5          | 0-0.5          | 65.83    | 1.9 | 158.8          | 0.41 |
| 53  | <i>B. spissa</i> | 8       | 8          | 0-0.5          | 85.07    | 1.9 | 158.8          | 0.54 |
| 53  | <i>B. spissa</i> | 8       | 12         | 0-0.5          | 61.47    | 1.9 | 158.8          | 0.39 |
| 54  | <i>B. spissa</i> | 8       | 2          | 0-0.5          | 56.79    | 1.9 | 158.8          | 0.36 |
| 54  | <i>B. spissa</i> | 8       | 5          | 0-0.5          | 96.07    | 1.9 | 158.8          | 0.60 |
| 54  | <i>B. spissa</i> | 8       | 8          | 0-0.5          | 64.18    | 1.9 | 158.8          | 0.40 |
| 54  | <i>B. spissa</i> | 8       | 12         | 0-0.5          | 73.67    | 1.9 | 158.8          | 0.46 |
| 55  | <i>B. spissa</i> | 8       | 2          | 0-0.5          | 13.82    | 1.9 | 158.8          | 0.09 |
| 55  | <i>B. spissa</i> | 8       | 5          | 0-0.5          | 25.61    | 1.9 | 158.8          | 0.16 |
| 55  | <i>B. spissa</i> | 8       | 8          | 0-0.5          | 29.69    | 1.9 | 158.8          | 0.19 |
| 55  | <i>B. spissa</i> | 8       | 12         | 0-0.5          | 33.77    | 1.9 | 158.8          | 0.21 |
| 56  | <i>B. spissa</i> | 8       | 2          | 0-0.5          | 32.35    | 1.9 | 158.8          | 0.20 |

|    |                  |   |    |       |        |     |         |      |
|----|------------------|---|----|-------|--------|-----|---------|------|
| 56 | <i>B. spissa</i> | 8 | 5  | 0-0.5 | 160.07 | 1.9 | 158.8   | 1.01 |
| 56 | <i>B. spissa</i> | 8 | 8  | 0-0.5 | 85.01  | 1.9 | 158.8   | 0.54 |
| 56 | <i>B. spissa</i> | 8 | 12 | 0-0.5 | 68.27  | 1.9 | 158.8   | 0.43 |
| 57 | <i>B. spissa</i> | 8 | 2  | 0-0.5 | 62.74  | 1.9 | 158.8   | 0.40 |
| 57 | <i>B. spissa</i> | 8 | 5  | 0-0.5 | 56.12  | 1.9 | 158.8   | 0.35 |
| 57 | <i>B. spissa</i> | 8 | 8  | 0-0.5 | 65.33  | 1.9 | 158.8   | 0.41 |
| 57 | <i>B. spissa</i> | 8 | 12 | 0-0.5 | 54.11  | 1.9 | 158.8   | 0.34 |
| 58 | <i>B. spissa</i> | 8 | 3  | 0-0.5 | 14.04  | 1.9 | 158.8   | 0.09 |
| 58 | <i>B. spissa</i> | 8 | 8  | 0-0.5 | 96.10  | 1.9 | 158.8   | 0.61 |
| 58 | <i>B. spissa</i> | 8 | 12 | 0-0.5 | 63.73  | 1.9 | 158.8   | 0.40 |
| 59 | <i>B. spissa</i> | 8 | 5  | 0-0.5 | 45.63  | 1.9 | 158.8   | 0.29 |
| 59 | <i>B. spissa</i> | 8 | 12 | 0-0.5 | 59.80  | 1.9 | 158.8   | 0.38 |
| 60 | <i>B. spissa</i> | 9 | 2  | 0-0.5 | 83.05  | 2.2 | no data |      |
| 60 | <i>B. spissa</i> | 9 | 5  | 0-0.5 | 144.96 | 2.2 | no data |      |
| 60 | <i>B. spissa</i> | 9 | 8  | 0-0.5 | 121.06 | 2.2 | no data |      |
| 60 | <i>B. spissa</i> | 9 | 12 | 0-0.5 | 119.73 | 2.2 | no data |      |
| 61 | <i>B. spissa</i> | 9 | 2  | 0-0.5 | 133.37 | 2.2 | no data |      |
| 61 | <i>B. spissa</i> | 9 | 5  | 0-0.5 | 273.02 | 2.2 | no data |      |
| 61 | <i>B. spissa</i> | 9 | 8  | 0-0.5 | 181.53 | 2.2 | no data |      |
| 61 | <i>B. spissa</i> | 9 | 12 | 0-0.5 | 165.67 | 2.2 | no data |      |
| 63 | <i>B. spissa</i> | 9 | 8  | 0-0.5 | 62.66  | 2.2 | no data |      |
| 63 | <i>B. spissa</i> | 9 | 12 | 0-0.5 | 71.88  | 2.2 | no data |      |
| 64 | <i>B. spissa</i> | 9 | 5  | 0-0.5 | 152.53 | 2.2 | no data |      |
| 64 | <i>B. spissa</i> | 9 | 8  | 0-0.5 | 94.90  | 2.2 | no data |      |
| 64 | <i>B. spissa</i> | 9 | 12 | 0-0.5 | 60.20  | 2.2 | no data |      |
| 65 | <i>B. spissa</i> | 9 | 2  | 0.5-1 | 264.03 | 2.2 | no data |      |
| 65 | <i>B. spissa</i> | 9 | 5  | 0.5-1 | 41.21  | 2.2 | no data |      |
| 65 | <i>B. spissa</i> | 9 | 8  | 0.5-1 | 177.07 | 2.2 | no data |      |
| 65 | <i>B. spissa</i> | 9 | 12 | 0.5-1 | 118.65 | 2.2 | no data |      |
| 67 | <i>B. spissa</i> | 9 | 2  | 0.5-1 | 79.88  | 2.2 | no data |      |
| 67 | <i>B. spissa</i> | 9 | 5  | 0.5-1 | 163.35 | 2.2 | no data |      |
| 67 | <i>B. spissa</i> | 9 | 8  | 0.5-1 | 164.15 | 2.2 | no data |      |
| 67 | <i>B. spissa</i> | 9 | 12 | 0.5-1 | 116.29 | 2.2 | no data |      |
| 68 | <i>B. spissa</i> | 9 | 2  | 0.5-1 | 88.22  | 2.2 | no data |      |
| 68 | <i>B. spissa</i> | 9 | 12 | 0.5-1 | 88.00  | 2.2 | no data |      |

| i.d | Species                     | Station | Chamber F= | Sed depth (cm) | Mn/Ca    | ALD | Mn/Casw at ALD | DMn  |
|-----|-----------------------------|---------|------------|----------------|----------|-----|----------------|------|
|     |                             |         |            |                | μmol/mol | cm  | μmol/mol       |      |
| 6   | <i>U. cf. graciliformis</i> | 6       | 2          | 0-0.5          | 26.15    | 2.7 | 53.6           | 0.49 |
| 6   | <i>U. cf. graciliformis</i> | 6       | 4          | 0-0.5          | 22.35    | 2.7 | 53.6           | 0.42 |
| 7   | <i>U. cf. graciliformis</i> | 6       | 1          | 0-0.5          | 13.30    | 2.7 | 53.6           | 0.25 |
| 7   | <i>U. cf. graciliformis</i> | 6       | 4          | 0-0.5          | 40.03    | 2.7 | 53.6           | 0.75 |
| 8   | <i>U. cf. graciliformis</i> | 6       | 4          | 0-0.5          | 30.96    | 2.7 | 53.6           | 0.58 |
| 9   | <i>U. cf. graciliformis</i> | 6       | 1          | 0-0.5          | 25.32    | 2.7 | 53.6           | 0.47 |
| 9   | <i>U. cf. graciliformis</i> | 6       | 3          | 0-0.5          | 32.69    | 2.7 | 53.6           | 0.61 |
| 11  | <i>U. cf. graciliformis</i> | 6       | 2          | 0-0.5          | 48.08    | 2.7 | 53.6           | 0.90 |
| 11  | <i>U. cf. graciliformis</i> | 6       | 4          | 0-0.5          | 32.66    | 2.7 | 53.6           | 0.61 |
| 12  | <i>U. cf. graciliformis</i> | 6       | 1          | 0-0.5          | 27.36    | 2.7 | 53.6           | 0.51 |
| 12  | <i>U. cf. graciliformis</i> | 6       | 4          | 0-0.5          | 33.91    | 2.7 | 53.6           | 0.63 |
| 62  | <i>U. cf. graciliformis</i> | 6       | 1          | 0-0.5          | 28.40    | 2.7 | 53.6           | 0.53 |
| 64  | <i>U. akitaensis</i>        | 7       | 4          | 0-0.5          | 18.36    | 2.1 | no data        |      |
| 64  | <i>U. akitaensis</i>        | 7       | 2          | 0-0.5          | 39.13    | 2.1 | no data        |      |
| 65  | <i>U. akitaensis</i>        | 7       | 4          | 0-0.5          | 31.72    | 2.1 | no data        |      |
| 65  | <i>U. akitaensis</i>        | 7       | 2          | 0-0.5          | 20.62    | 2.1 | no data        |      |
| 66  | <i>U. akitaensis</i>        | 7       | 4          | 0-0.5          | 29.64    | 2.1 | no data        |      |
| 66  | <i>U. akitaensis</i>        | 7       | 6          | 0-0.5          | 13.63    | 2.1 | no data        |      |
| 67  | <i>U. akitaensis</i>        | 7       | 4          | 0-0.5          | 31.34    | 2.1 | no data        |      |
| 67  | <i>U. akitaensis</i>        | 7       | 2          | 0-0.5          | 24.63    | 2.1 | no data        |      |
| 67  | <i>U. akitaensis</i>        | 7       | 6          | 0-0.5          | 26.12    | 2.1 | no data        |      |
| 68  | <i>U. akitaensis</i>        | 7       | 4          | 0-0.5          | 31.19    | 2.1 | no data        |      |
| 68  | <i>U. akitaensis</i>        | 7       | 2          | 0-0.5          | 19.86    | 2.1 | no data        |      |
| 68  | <i>U. akitaensis</i>        | 7       | 6          | 0-0.5          | 27.27    | 2.1 | no data        |      |
| 69  | <i>U. akitaensis</i>        | 7       | 4          | 0-0.5          | 31.49    | 2.1 | no data        |      |
| 69  | <i>U. akitaensis</i>        | 7       | 2          | 0-0.5          | 32.20    | 2.1 | no data        |      |
| 69  | <i>U. akitaensis</i>        | 7       | 6          | 0-0.5          | 29.12    | 2.1 | no data        |      |
| 70  | <i>U. akitaensis</i>        | 7       | 4          | 0-0.5          | 39.90    | 2.1 | no data        |      |
| 70  | <i>U. akitaensis</i>        | 7       | 2          | 0-0.5          | 15.47    | 2.1 | no data        |      |
| 70  | <i>U. akitaensis</i>        | 7       | 6          | 0-0.5          | 32.11    | 2.1 | no data        |      |
| 71  | <i>U. akitaensis</i>        | 7       | 5          | 0-0.5          | 21.48    | 2.1 | no data        |      |
| 71  | <i>U. akitaensis</i>        | 7       | 2          | 0-0.5          | 15.64    | 2.1 | no data        |      |
| 72  | <i>U. akitaensis</i>        | 7       | 2          | 0-0.5          | 13.32    | 2.1 | no data        |      |
| 72  | <i>U. akitaensis</i>        | 7       | 6          | 0-0.5          | 25.05    | 2.1 | no data        |      |
| 73  | <i>U. akitaensis</i>        | 7       | 2          | 0-0.5          | 10.03    | 2.1 | no data        |      |
| 73  | <i>U. akitaensis</i>        | 7       | 5          | 0-0.5          | 16.87    | 2.1 | no data        |      |
| 74  | <i>U. akitaensis</i>        | 8       | 4          | 0-0.5          | 53.69    | 1.4 | 227.4          | 0.24 |
| 74  | <i>U. akitaensis</i>        | 8       | 2          | 0-0.5          | 73.59    | 1.4 | 227.4          | 0.32 |
| 74  | <i>U. akitaensis</i>        | 8       | 5          | 0-0.5          | 69.33    | 1.4 | 227.4          | 0.30 |
| 75  | <i>U. akitaensis</i>        | 8       | 4          | 0-0.5          | 29.72    | 1.4 | 227.4          | 0.13 |
| 75  | <i>U. akitaensis</i>        | 8       | 6          | 0-0.5          | 54.70    | 1.4 | 227.4          | 0.24 |
| 76  | <i>U. akitaensis</i>        | 8       | 2          | 0-0.5          | 26.98    | 1.4 | 227.4          | 0.12 |
| 76  | <i>U. akitaensis</i>        | 8       | 6          | 0-0.5          | 28.80    | 1.4 | 227.4          | 0.13 |
| 77  | <i>U. akitaensis</i>        | 8       | 4          | 0-0.5          | 9.51     | 1.4 | 227.4          | 0.04 |

|    |                      |   |   |        |        |     |         |      |
|----|----------------------|---|---|--------|--------|-----|---------|------|
| 77 | <i>U. akitaensis</i> | 8 | 2 | 0.-0.5 | 8.46   | 1.4 | 227.4   | 0.04 |
| 77 | <i>U. akitaensis</i> | 8 | 6 | 0.-0.5 | 45.80  | 1.4 | 227.4   | 0.20 |
| 78 | <i>U. akitaensis</i> | 8 | 2 | 0.-0.5 | 23.01  | 1.4 | 227.4   | 0.10 |
| 78 | <i>U. akitaensis</i> | 8 | 6 | 0.-0.5 | 23.39  | 1.4 | 227.4   | 0.10 |
| 79 | <i>U. akitaensis</i> | 8 | 4 | 0-0.5  | 22.02  | 1.4 | 227.4   | 0.10 |
| 79 | <i>U. akitaensis</i> | 8 | 2 | 0.-0.5 | 24.39  | 1.4 | 227.4   | 0.11 |
| 79 | <i>U. akitaensis</i> | 8 | 6 | 0.-0.5 | 46.83  | 1.4 | 227.4   | 0.21 |
| 80 | <i>U. akitaensis</i> | 8 | 2 | 0.-0.5 | 6.28   | 1.4 | 227.4   | 0.03 |
| 80 | <i>U. akitaensis</i> | 8 | 5 | 0.-0.5 | 12.29  | 1.4 | 227.4   | 0.05 |
| 81 | <i>U. akitaensis</i> | 8 | 4 | 0-0.5  | 27.20  | 1.4 | 227.4   | 0.12 |
| 81 | <i>U. akitaensis</i> | 8 | 2 | 0.-0.5 | 24.41  | 1.4 | 227.4   | 0.11 |
| 82 | <i>U. akitaensis</i> | 8 | 2 | 0.-0.5 | 17.27  | 1.4 | 227.4   | 0.08 |
| 82 | <i>U. akitaensis</i> | 8 | 6 | 0.-0.5 | 18.29  | 1.4 | 227.4   | 0.08 |
| 83 | <i>U. akitaensis</i> | 8 | 4 | 0-0.5  | 26.71  | 1.4 | 227.4   | 0.12 |
| 83 | <i>U. akitaensis</i> | 8 | 6 | 0.-0.5 | 18.49  | 1.4 | 227.4   | 0.08 |
| 13 | <i>U. akitaensis</i> | 9 | 1 | 1-1.5  | 63.84  | 1   | no data |      |
| 13 | <i>U. akitaensis</i> | 9 | 3 | 1-1.5  | 41.44  | 1   | no data |      |
| 13 | <i>U. akitaensis</i> | 9 | 5 | 1-1.5  | 175.96 | 1   | no data |      |
| 14 | <i>U. akitaensis</i> | 9 | 1 | 1-1.5  | 29.24  | 1   | no data |      |
| 14 | <i>U. akitaensis</i> | 9 | 3 | 1-1.5  | 26.91  | 1   | no data |      |
| 14 | <i>U. akitaensis</i> | 9 | 6 | 1-1.5  | 79.43  | 1   | no data |      |
| 15 | <i>U. akitaensis</i> | 9 | 1 | 1-1.5  | 55.41  | 1   | no data |      |
| 15 | <i>U. akitaensis</i> | 9 | 3 | 1-1.5  | 60.78  | 1   | no data |      |
| 15 | <i>U. akitaensis</i> | 9 | 5 | 1-1.5  | 87.37  | 1   | no data |      |
| 84 | <i>U. akitaensis</i> | 9 | 4 | 0-0.5  | 29.65  | 1   | no data |      |
| 84 | <i>U. akitaensis</i> | 9 | 6 | 0.-0.5 | 45.43  | 1   | no data |      |
| 85 | <i>U. akitaensis</i> | 9 | 4 | 0-0.5  | 46.63  | 1   | no data |      |
| 85 | <i>U. akitaensis</i> | 9 | 2 | 0.-0.5 | 77.71  | 1   | no data |      |
| 85 | <i>U. akitaensis</i> | 9 | 6 | 0.-0.5 | 62.51  | 1   | no data |      |
| 86 | <i>U. akitaensis</i> | 9 | 4 | 0-0.5  | 24.45  | 1   | no data |      |
| 86 | <i>U. akitaensis</i> | 9 | 2 | 0.-0.5 | 61.07  | 1   | no data |      |
| 86 | <i>U. akitaensis</i> | 9 | 6 | 0.-0.5 | 67.69  | 1   | no data |      |
| 87 | <i>U. akitaensis</i> | 9 | 4 | 0-0.5  | 30.02  | 1   | no data |      |
| 87 | <i>U. akitaensis</i> | 9 | 2 | 0.-0.5 | 24.52  | 1   | no data |      |
| 87 | <i>U. akitaensis</i> | 9 | 6 | 0.-0.5 | 28.87  | 1   | no data |      |
| 88 | <i>U. akitaensis</i> | 9 | 4 | 0-0.5  | 104.08 | 1   | no data |      |
| 88 | <i>U. akitaensis</i> | 9 | 2 | 0.-0.5 | 20.10  | 1   | no data |      |
| 89 | <i>U. akitaensis</i> | 9 | 4 | 0-0.5  | 54.55  | 1   | no data |      |
| 89 | <i>U. akitaensis</i> | 9 | 2 | 0.-0.5 | 37.77  | 1   | no data |      |
| 89 | <i>U. akitaensis</i> | 9 | 6 | 0.-0.5 | 38.01  | 1   | no data |      |
| 90 | <i>U. akitaensis</i> | 9 | 2 | 0.-0.5 | 41.16  | 1   | no data |      |
| 90 | <i>U. akitaensis</i> | 9 | 6 | 0.-0.5 | 55.19  | 1   | no data |      |
| 91 | <i>U. akitaensis</i> | 9 | 2 | 0.-0.5 | 65.51  | 1   | no data |      |
| 91 | <i>U. akitaensis</i> | 9 | 6 | 0.-0.5 | 50.95  | 1   | no data |      |
| 92 | <i>U. akitaensis</i> | 9 | 2 | 0.-0.5 | 10.79  | 1   | no data |      |
| 92 | <i>U. akitaensis</i> | 9 | 6 | 0.-0.5 | 70.93  | 1   | no data |      |



|    |                      |   |   |        |        |   |         |
|----|----------------------|---|---|--------|--------|---|---------|
| 93 | <i>U. akitaensis</i> | 9 | 2 | 0.-0.5 | 47.44  | 1 | no data |
| 93 | <i>U. akitaensis</i> | 9 | 6 | 0.-0.5 | 70.19  | 1 | no data |
| 94 | <i>U. akitaensis</i> | 9 | 5 | 0.5-1  | 91.65  | 1 | no data |
| 94 | <i>U. akitaensis</i> | 9 | 2 | 0.5-1  | 12.72  | 1 | no data |
| 94 | <i>U. akitaensis</i> | 9 | 6 | 0.5-1  | 54.61  | 1 | no data |
| 95 | <i>U. akitaensis</i> | 9 | 5 | 0.5-1  | 53.94  | 1 | no data |
| 95 | <i>U. akitaensis</i> | 9 | 2 | 0.5-1  | 172.32 | 1 | no data |
| 95 | <i>U. akitaensis</i> | 9 | 6 | 0.5-1  | 28.94  | 1 | no data |
| 96 | <i>U. akitaensis</i> | 9 | 4 | 0.5-1  | 64.88  | 1 | no data |
| 96 | <i>U. akitaensis</i> | 9 | 2 | 0.5-1  | 58.96  | 1 | no data |

| <b>i.d</b> | <b>Species</b>        | <b>Station</b> | <b>Chamber F=</b> | <b>Sed depth (cm)</b> | <b>Mn/Ca<br/>μmol/mol</b> | <b>ALD<br/>cm</b> | <b>Mn/Casw at ALD<br/>μmol/mol</b> | <b>DMn</b> |
|------------|-----------------------|----------------|-------------------|-----------------------|---------------------------|-------------------|------------------------------------|------------|
| 11         | <i>N. labradorica</i> | 7              | 4                 | 0-0.5                 | 45.20                     | 2.3               | no data                            |            |
| 9          | <i>N. labradorica</i> | 7              | 4                 | 0-0.5                 | 101.06                    | 2.3               | no data                            |            |
| 42         | <i>N. labradorica</i> | 7              | 5                 | 0-0.5                 | 57.37                     | 2.3               | no data                            |            |
| 43         | <i>N. labradorica</i> | 7              | 1                 | 0-0.5                 | 118.84                    | 2.3               | no data                            |            |
| 43         | <i>N. labradorica</i> | 7              | 6                 | 0-0.5                 | 97.63                     | 2.3               | no data                            |            |
| 14         | <i>N. labradorica</i> | 8              | 4                 | 0-0.5                 | 57.32                     | 4                 | 81.1                               | 0.71       |
| 15         | <i>N. labradorica</i> | 8              | 1                 | 0-0.5                 | 50.31                     | 4                 | 81.1                               | 0.62       |
| 16         | <i>N. labradorica</i> | 8              | 3                 | 2-2.5                 | 23.40                     | 4                 | 81.1                               | 0.29       |
| 17         | <i>N. labradorica</i> | 8              | 4                 | 2-2.5                 | 63.18                     | 4                 | 81.1                               | 0.78       |
| 18         | <i>N. labradorica</i> | 8              | 1                 | 4.0-5.0               | 276.98                    | 4                 | 81.1                               | 3.41       |
| 21         | <i>N. labradorica</i> | 8              | 4                 | 4.0-5.0               | 157.87                    | 4                 | 81.1                               | 1.95       |
| 22         | <i>N. labradorica</i> | 8              | 3                 | 4.0-5.0               | 189.49                    | 4                 | 81.1                               | 2.34       |
| 23         | <i>N. labradorica</i> | 8              | 4                 | 4.0-5.0               | 35.09                     | 4                 | 81.1                               | 0.43       |
| 25         | <i>N. labradorica</i> | 8              | 4                 | 4.0-5.0               | 54.58                     | 4                 | 81.1                               | 0.67       |
| 26         | <i>N. labradorica</i> | 10             | 3                 | 0-0.5                 | 27.58                     | 4                 | 391.3                              | 0.07       |
| 27         | <i>N. labradorica</i> | 10             | 3                 | 0-0.5                 | 51.45                     | 4                 | 391.3                              | 0.13       |
| 28         | <i>N. labradorica</i> | 10             | 4                 | 0-0.5                 | 72.33                     | 4                 | 391.3                              | 0.18       |
| 29         | <i>N. labradorica</i> | 10             | 1                 | 0-0.5                 | 169.29                    | 4                 | 391.3                              | 0.43       |

| i.d | Species             | Station | Chamber F= | Sed depth (cm) | Mn/Ca    | ALD | Mn/Casw at ALD | DMn  |
|-----|---------------------|---------|------------|----------------|----------|-----|----------------|------|
|     |                     |         |            |                | μmol/mol | cm  | μmol/mol       |      |
| 17  | <i>C. fimbriata</i> | 7       | 1          | 0-0.5          | 70.03    | 2.7 | no data        |      |
| 19  | <i>C. fimbriata</i> | 7       | 1          | 2.5-3          | 124.65   | 2.7 | no data        |      |
| 23  | <i>C. fimbriata</i> | 8       | 1          | 4.0-5.0        | 41.42    | 5.1 | 38.9           | 1.07 |
| 23  | <i>C. fimbriata</i> | 8       | 1          | 4.0-5.0        | 78.80    | 5.1 | 38.9           | 2.03 |
| 24  | <i>C. fimbriata</i> | 8       | 1          | 4.0-5.0        | 86.32    | 5.1 | 38.9           | 2.22 |
| 29  | <i>C. fimbriata</i> | 9       | 1          | 1-1.5          | 94.98    | 5   | no data        |      |
| 30  | <i>C. fimbriata</i> | 9       | 1          | 1-1.5          | 81.85    | 5   | no data        |      |
| 31  | <i>C. fimbriata</i> | 9       | 1          | 3-3.5          | 199.08   | 5   | no data        |      |
| 32  | <i>C. fimbriata</i> | 9       | 1          | 3-3.5          | 228.21   | 5   | no data        |      |
| 33  | <i>C. fimbriata</i> | 9       | 1          | 3-3.5          | 69.26    | 5   | no data        |      |
| 34  | <i>C. fimbriata</i> | 9       | 1          | 3-3.5          | 95.37    | 5   | no data        |      |
| 35  | <i>C. fimbriata</i> | 9       | 1          | 3-3.5          | 184.99   | 5   | no data        |      |
| 36  | <i>C. fimbriata</i> | 9       | 1          | 3-3.5          | 231.29   | 5   | no data        |      |
| 37  | <i>C. fimbriata</i> | 9       | 1          | 3-3.5          | 110.20   | 5   | no data        |      |
| 38  | <i>C. fimbriata</i> | 9       | 1          | 3-3.5          | 86.94    | 5   | no data        |      |

The average Mn/Ca and DMn-values for each species

| Station | <i>E. batialis</i> |      | <i>B. spissa</i> |      | <i>Uvigerina spp.</i> |      | <i>N. labradorica</i> |      | <i>C. fibmriata</i> |      |
|---------|--------------------|------|------------------|------|-----------------------|------|-----------------------|------|---------------------|------|
|         | Mn/Ca              | DMn  | Mn/Ca            | DMn  | Mn/Ca                 | DMn  | Mn/Ca                 | DMn  | Mn/Ca               | DMn  |
|         | μmol/mol           |      | μmol/mol         |      | μmol/mol              |      | μmol/mol              |      | μmol/mol            |      |
| 6       |                    |      |                  |      | 30.10                 | 0.56 |                       |      |                     |      |
| 7       | 19.07              |      | 36.96            |      | 24.84                 |      | 84.02                 |      | 97.34               |      |
| 8       | 9.14               | 0.04 | 57.49            | 0.36 | 30.05                 | 0.13 | 100.91                | 1.24 | 68.85               | 1.77 |
| 9       | 5.27               |      | 128.93           |      | 56.67                 |      |                       |      | 138.22              |      |
| 10      | 2.45               | 0.02 |                  |      |                       |      | 80.16                 | 0.20 |                     |      |

**Mn pore water data**

| <b>Station</b> | <b>sedm depth<br/>cm</b> | <b>mid depth<br/>cm</b> | <b>Mn<br/>μmol/l</b> |
|----------------|--------------------------|-------------------------|----------------------|
| <b>10</b>      | bottom water             | bottom water            | 0.1                  |
|                | 0-0.5                    | 0.25                    | 1.1                  |
|                | 0.5-1                    | 0.75                    | 1.7                  |
|                | 1-1.5                    | 1.25                    | 1.5                  |
|                | 1.5-2                    | 1.75                    | 1.6                  |
|                | 2-3                      | 2.5                     | 3.6                  |
|                | 3-4                      | 3.5                     | 3.9                  |
|                | 4-5                      | 4.5                     | 4.5                  |
|                | 5-6                      | 5.5                     | 5.0                  |
|                | 6-7                      | 6.5                     | 4.6                  |
|                | 8-9                      | 8.5                     | 4.5                  |
|                | 9-10                     | 9.5                     | 3.8                  |
|                | 10-12                    | 11                      | 2.9                  |
|                | 12-14                    | 13                      | 1.7                  |
|                | 14-16                    | 15                      | 1.3                  |
| 16-18          | 17                       | 1.2                     |                      |
| 18-20          | 19                       | 1.1                     |                      |
| <b>8</b>       | bottom water             | bottom water            | 0.1                  |
|                | 0-0.5                    | 0.25                    | 1.1                  |
|                | 0.5-1                    | 0.75                    | 2.1                  |
|                | 1-1.5                    | 1.25                    | 2.3                  |
|                | 1.5-2                    | 1.75                    | 1.6                  |
|                | 2-3                      | 2.5                     | 1.2                  |
|                | 3-4                      | 3.5                     | 0.8                  |
|                | 4-5                      | 4.5                     | 0.5                  |
|                | 5-6                      | 5.5                     | 0.4                  |
|                | 6-7                      | 6.5                     | 0.4                  |
|                | 7-8                      | 7.5                     | 0.4                  |
|                | 8-9                      | 8.5                     | 0.6                  |
|                | 9-10                     | 9.5                     | 0.4                  |
|                | 10-12                    | 11                      | 0.4                  |
|                | 12-14                    | 13                      | 0.4                  |
| 14-16          | 15                       | 0.4                     |                      |
| 16-18          | 17                       |                         |                      |
| 18-20          | 19                       | 0.9                     |                      |
| <b>6</b>       | bottom water             | bottom water            | 0.0                  |
|                | 0-0.5                    | 0.25                    | 1.1                  |
|                | 0.5-1                    | 0.75                    | 1.4                  |
|                | 1-1.5                    | 1.25                    | 1.2                  |
|                | 1.5-2                    | 1.75                    | 0.6                  |

|       |     |     |
|-------|-----|-----|
| 2-3   | 2.5 | 0.5 |
| 3-4   | 3.5 | 1.0 |
| 4-5   | 4.5 | 0.3 |
| 5-6   | 5.5 | 0.3 |
| 6-7   | 6.5 | 0.3 |
| 7-8   | 7.5 | 0.3 |
| 8-9   | 8.5 | 0.4 |
| 9-10  | 9.5 | 0.2 |
| 10-12 | 11  | 0.3 |
| 12-14 | 13  | 0.4 |
| 14-16 | 15  | 0.6 |
| 16-18 | 17  | 0.6 |
| 18-20 | 19  | 1.1 |
